# Supplementary material for: Diagnostic Infectious Diseases Testing Outside Clinics: A Global Systematic Review and Meta-analysis
Source: PubMed Central journal article supplement — Open Forum Infect Dis. 2020 Aug 19;7(10):ofaa360. doi: 10.1093/ofid/ofaa360 (PMC7545117; doi:10.1093/ofid/ofaa360), 2020-08-19
Supplement: ofaa360_suppl_supplementary_material.pdf [file ofaa360_suppl_supplementary_material.pdf]

## **Supplementary Materials**

Supplemental file 1: PRISMA Checklist

Supplemental file 2: The systematic review protocol

Supplemental file 3: Search Strategy- Search terms and Boolean connectors

Supplemental file 4: Summary of studies included

Supplemental File 5: GRADE Tables and quality of evidence

## Supplemental File 1: PRISMA Checklist

| Section/topic                      | #  | Checklist item                                                                                                                                                                                                                                                                                              | Reported on page #                    |
|------------------------------------|----|-------------------------------------------------------------------------------------------------------------------------------------------------------------------------------------------------------------------------------------------------------------------------------------------------------------|---------------------------------------|
| <b>TITLE</b>                       |    |                                                                                                                                                                                                                                                                                                             |                                       |
| Title                              | 1  | Identify the report as a systematic review, meta-analysis, or both.                                                                                                                                                                                                                                         | 1, 2                                  |
| <b>ABSTRACT</b>                    |    |                                                                                                                                                                                                                                                                                                             |                                       |
| Structured summary                 | 2  | Provide a structured summary including, as applicable: background; objectives; data sources; study eligibility criteria, participants, and interventions; study appraisal and synthesis methods; results; limitations; conclusions and implications of key findings; systematic review registration number. | 2                                     |
| <b>INTRODUCTION</b>                |    |                                                                                                                                                                                                                                                                                                             |                                       |
| Rationale                          | 3  | Describe the rationale for the review in the context of what is already known.                                                                                                                                                                                                                              | 3                                     |
| Objectives                         | 4  | Provide an explicit statement of questions being addressed with reference to participants, interventions, comparisons, outcomes, and study design (PICOS).                                                                                                                                                  | 3                                     |
| <b>METHODS</b>                     |    |                                                                                                                                                                                                                                                                                                             |                                       |
| Protocol and registration          | 5  | Indicate if a review protocol exists, if and where it can be accessed (e.g., Web address), and, if available, provide registration information including registration number.                                                                                                                               | Supplemental file 1<br>CRD42019140828 |
| Eligibility criteria               | 6  | Specify study characteristics (e.g., PICOS, length of follow-up) and report characteristics (e.g., years considered, language, publication status) used as criteria for eligibility, giving rationale.                                                                                                      | 4                                     |
| Information sources                | 7  | Describe all information sources (e.g., databases with dates of coverage, contact with study authors to identify additional studies) in the search and date last searched.                                                                                                                                  | 4                                     |
| Search                             | 8  | Present full electronic search strategy for at least one database, including any limits used, such that it could be repeated.                                                                                                                                                                               | Supplemental file 2                   |
| Study selection                    | 9  | State the process for selecting studies (i.e., screening, eligibility, included in systematic review, and, if applicable, included in the meta-analysis).                                                                                                                                                   | 5                                     |
| Data collection process            | 10 | Describe method of data extraction from reports (e.g., piloted forms, independently, in duplicate) and any processes for obtaining and confirming data from investigators.                                                                                                                                  | 5                                     |
| Data items                         | 11 | List and define all variables for which data were sought (e.g., PICOS, funding sources) and any assumptions and simplifications made.                                                                                                                                                                       | 5                                     |
| Risk of bias in individual studies | 12 | Describe methods used for assessing risk of bias of individual studies (including specification of whether this was done at the study or outcome level), and how this information is to be used in any data synthesis.                                                                                      | 5                                     |
| Summary measures                   | 13 | State the principal summary measures (e.g., risk ratio, difference in means).                                                                                                                                                                                                                               | 5                                     |

|                               |    |                                                                                                                                                                                                          |                     |
|-------------------------------|----|----------------------------------------------------------------------------------------------------------------------------------------------------------------------------------------------------------|---------------------|
| Synthesis of results          | 14 | Describe the methods of handling data and combining results of studies, if done, including measures of consistency (e.g., $I^2$ ) for each meta-analysis.                                                | 6                   |
| Risk of bias across studies   | 15 | Specify any assessment of risk of bias that may affect the cumulative evidence (e.g., publication bias, selective reporting within studies).                                                             | Supplemental file 3 |
| Additional analyses           | 16 | Describe methods of additional analyses (e.g., sensitivity or subgroup analyses, meta-regression), if done, indicating which were pre-specified.                                                         | 6                   |
| <b>RESULTS</b>                |    |                                                                                                                                                                                                          |                     |
| Study selection               | 17 | Give numbers of studies screened, assessed for eligibility, and included in the review, with reasons for exclusions at each stage, ideally with a flow diagram.                                          | 17                  |
| Study characteristics         | 18 | For each study, present characteristics for which data were extracted (e.g., study size, PICOS, follow-up period) and provide the citations.                                                             | Supplemental file 4 |
| Risk of bias within studies   | 19 | Present data on risk of bias of each study and, if available, any outcome level assessment (see item 12).                                                                                                | 18                  |
| Results of individual studies | 20 | For all outcomes considered (benefits or harms), present, for each study: (a) simple summary data for each intervention group (b) effect estimates and confidence intervals, ideally with a forest plot. | 18                  |
| Synthesis of results          | 21 | Present results of each meta-analysis done, including confidence intervals and measures of consistency.                                                                                                  | 18                  |
| Risk of bias across studies   | 22 | Present results of any assessment of risk of bias across studies (see Item 15).                                                                                                                          | 19                  |
| Additional analysis           | 23 | Give results of additional analyses, if done (e.g., sensitivity or subgroup analyses, meta-regression [see Item 16]).                                                                                    | 8                   |
| <b>DISCUSSION</b>             |    |                                                                                                                                                                                                          |                     |
| Summary of evidence           | 24 | Summarize the main findings including the strength of evidence for each main outcome; consider their relevance to key groups (e.g., healthcare providers, users, and policy makers).                     | 6                   |
| Limitations                   | 25 | Discuss limitations at study and outcome level (e.g., risk of bias), and at review-level (e.g., incomplete retrieval of identified research, reporting bias).                                            | 10                  |
| Conclusions                   | 26 | Provide a general interpretation of the results in the context of other evidence, and implications for future research.                                                                                  | 8-9                 |
| <b>FUNDING</b>                |    |                                                                                                                                                                                                          |                     |
| Funding                       | 27 | Describe sources of funding for the systematic review and other support (e.g., supply of data); role of funders for the systematic review.                                                               | 11                  |

## **Supplemental File 2: The systematic review protocol**

### **1.0 Background**

Infectious diseases such as malaria, syphilis, and tuberculosis (TB) still remain key contributors to global mortality rates and caused over 2.8million estimated deaths by December 2017.<sup>1</sup>

Integrated modes of health services delivery were therefore developed as part of interventional efforts to reduce mortality rates and improve the overall quality of life of affected populations.<sup>2,3</sup>

Improving availability and accessibility to routine screening under the integrated modes of services delivery has proven effective in prevention strategies for infectious disease transmission.<sup>4</sup> However, most people, particularly in Low and Middle Income Countries (LMICs), still face delays in early diagnosis due to various reasons including inaccessibility of health care centres and high cost of diagnostic testing services.<sup>5,6</sup> Compounding this challenge is the impact of limited availability of skilled human resources, and inadequate healthcare and diagnostics infrastructure in these LMICs due to limited resources.<sup>7,8</sup>

In global efforts to improve population health, rapid diagnostics have become the fastest growing diagnostics approach adopted for screening in settings with limited laboratory infrastructure and services globally.<sup>9,10</sup> Rapid diagnostics since their introduction have contributed immensely to early detection of infectious diseases making it vital in the expansion and provision of diagnostic testing services worldwide. Currently, first point testing for many infectious diseases is rapidly moving out of the clinical laboratory-based system and into people's lives as the need to improve access becomes more imperative. Researching impact, a recent scoping review evaluating the field use of rapid diagnostic tests for some infectious diseases found that rapid diagnostic tests being used in the urban context demonstrated viable impact on early case detection. Another systematic review investigating new approaches on improving access to healthcare for maternal

and child health outcomes in LMICs proposed the adoption of a framework that is centered on decentralized testing services using rapid diagnostics<sup>10,11</sup>. This new direction alters the context of testing in profound ways, with important implications for medicine and public health and requires further research.

The purpose of this study is to identify research and documented experiences on decentralized testing (which in this study is being defined as any form of testing or diagnostics sample acquisition performed outside of an established health center with laboratory services) through a systematic review.

### **1.1 Study Aim**

This systematic review seeks to summarize the existing and piloted models of decentralized testing for various infectious diseases as well as identify the advantages and limitations associated with each model type.

### **2.0 Method**

We will perform a systematic literature review using the Preferred Reporting Items for Systematic Reviews and Meta-Analyses (PRISMA) checklist.

#### **2.1 Search strategy and Approach**

Literature will be searched and retrieved from PubMed, Science Direct, Web of Knowledge databases, MEDLine, Global Health, CINAHL, and Health Systems Evidence. The Cochrane Library will also be systematically searched for manuscripts retrieval. Searches will combine key terms relating to infectious disease in vitro diagnostics with terms related to self-testing (home-test, self-test, etc.); community-based testing and self-sample collection.

#### **2.2a Inclusion criteria and Selection**

Criteria for articles selection is as follows:

1. Peer-reviewed publications including published literature from a wide range of disciplines within public health and social science including epidemiology, sociology, and clinical practice.
2. Studies with sufficient description of decentralized testing methods (detailed methodology)
3. Studies on decentralized testing model with a comparator group (facility/laboratory-based testing).
4. Studies written in English without date restrictions.
5. Studies that focus on decentralized in vitro testing (oral, blood, or other specimen) for infectious diseases (see appendix for list of disease to be included). *In vitro diagnostics is defined in this study as tests done on biological samples such as blood or tissue that have been obtained from the human body.*

### **2.2b Exclusion Criteria**

- Studies that focus on monitoring tests such as CD4, viral load, or other related tests.
- Studies that focus on decentralized testing for non-infectious diseases such as blood sugar tests, blood pressure, other chronic diseases, and pregnancy.
- Publications with full text in languages other than English
- Comments, all reviews, opinion pieces and letters to the editor.

### **2.3 Data extraction**

Endnote will be used as reference reviewing and management software for the duration of the project. References review will follow these steps:

Step 1: Title only

Step 2: Abstracts

Step 3: Full text, this will be reviewed in duplicate and reasons for exclusion will be stated

Full texts will be coded as EITHER eligible for inclusion OR ineligible, or they will be put in a third category labeled “Unsure” for a second opinion. (If it is not possible to ascertain whether a study is eligible based on title and abstract, the full text will be obtained). Results from both researchers will be reconciled. Where disagreements exist, resolution by full-text screening by both researchers will be employed. If disagreement persists, a third member of the study team will undertake a full-text review and provide an opinion.

Studies which are eligible for inclusion will be coded by study design, type of disease, year of publication, testing distribution mode and reported outcome of decentralized model in an Excel spreadsheet. Additional column on reported limitations and challenges in relation to the decentralization model will also be populated. Full text screening of eligible articles will be carried out considering the following criteria:

1. Does the study answer a focused question on decentralized testing/screening for any of the listed infectious diseases of interest?
2. Does the study comprehensively discuss the use of decentralized testing distribution models compared to facility/laboratory based testing?
3. Did the study use valid methods to address the question of interest?

If the answer to any of these questions is “no”, the study will be excluded from the review process but kept on aside for consideration during the discussion of study findings.

Following this coding, two team members will be tasked to ensure all studies undergo a data extraction process, whereby key data will be extracted and input into the designed spreadsheet.

Data extraction will be done from full text where available and abstract will only be used when full manuscripts cannot be sourced. Data to be extracted will include country of study, target population, aims, research date, study design, sample size, key results and summary of findings.

Detailed information on the outcomes will also be included

We will search references of published systematic reviews for published articles that the inclusion criteria of this study for consideration and inclusion

#### **2.4 Data analysis**

The study will focus on the strengths and limitations as well as the outcomes in the use of various models of decentralized testing and their mode of distribution in varying settings.

Insights around the following will also be extracted whenever possible: type of model adopted, settings of use, as well as type of population targeted, observed rate of first-time self-testers after adoption of model and utilisation rate among targeted population after intervention (if available).

Besides the extraction of these data, each study will be reviewed for various qualitative aspects of decentralized testing systems. A meta-analysis will be performed subsequently if articles with comparable outcomes are obtained.

#### **2.4 Quality appraisal**

During the systematic review process, a formal quality appraisal of studies will be completed using the GRADE approach and the 'Users' guides to the medical literature VI: How to use an overview'.

### **3.0 Expected Outcomes**

#### **Primary Outcomes**

- To identify various decentralized infectious diseases testing models



- Uptake of decentralized testing compared to uptake of testing in the comparator arm.

### **Secondary Outcomes**

- Adverse events associated with decentralized testing (e.g. coerced testing)
- Linkage to care and retention in care rates
- Cost effectiveness of decentralized testing methods
- Treatment uptake rates

### **4.0 Pre- Specified Sub analysis**

We anticipate the following sub - analysis

1. Individual infectious diseases (e.g. HIV versus others) and integration across diseases (e.g., integrated HIV/syphilis self-testing)
2. Compare outcomes based on type of test approach
3. Decentralized approaches (especially home-based, school, pharmacy, small clinic, etc)
4. Self – collection versus self – testing
5. Who did the testing (self-testing versus lay/health worker testing)

---

### **Appendix: List of Infectious disease considered under decentralised testing models**

---

Human Immunodeficiency Virus (HIV)

Human Papilloma Virus (HPV)

Hepatitis B Virus (HBV)

Hepatitis C Virus (HCV)

Syphilis

Chlamydia

Tuberculosis (TB)

Gonorrhoea

---

## References

1. Hannah R, Max R. "Causes of Death". Published online at OurWorldInData.org. [Online Resource]. 2019. Retrieved from: <https://ourworldindata.org/causes-of-death>. Accessed 30th March, 2020.
2. World Health Organization. New report shows that 400 million do not have access to essential health services. 2015. Available at: <http://www.who.int/mediacentre/news/releases/2015/uhc-report/en/> Accessed 30th March, 2020.
3. Price CP, Kricka LJ. Improving healthcare accessibility through point-of-care technologies. *Clinical chemistry* 2007; **53**(9): 1665-75.
4. Comino EJ, Davies GP, Krastev Y, et al. A systematic review of interventions to enhance access to best practice primary health care for chronic disease management, prevention and episodic care. *BMC Health Services Research* 2012; **12**(1): 415.
5. MacKinney, A., Coburn, A., Lundblad, J., McBride, T., Mueller, K., & Watson, S. (2014). Access to rural health care—a literature review and new synthesis. *Policy Report. Rupri: Rural Policy Research Institute*. Available at <https://www.rupri.org/?library=access-to-rural-health-care-a-literature-review-and-new-synthesis-report-prepared-by-the-rupri-health-panel-august-2014> Accessed 30th March, 2020.
6. Brundisini F, Giacomini M, DeJean D, Vanstone M, Winsor S, Smith A. Chronic disease patients' experiences with accessing health care in rural and remote areas: a systematic review and qualitative meta-synthesis. *Ont Health Technol Assess Ser* 2013; **13**(15): 1-33.
7. Sayed S, Cherniak W, Lawler M, et al. Improving pathology and laboratory medicine in low-income and middle-income countries: roadmap to solutions. *Lancet (London, England)* 2018; **391**(10133): 1939-52.
8. Strasser R. Rural health around the world: challenges and solutions. *Family practice* 2003; **20**(4): 457-63.
9. Kuupiel D, Bawontuo V, Mashamba-Thompson TP. Improving the Accessibility and Efficiency of Point-of-Care Diagnostics Services in Low- and Middle-Income Countries: Lean and Agile Supply Chain Management. *Diagnostics (Basel, Switzerland)* 2017; **7**(4).
10. Katoba J, Kuupiel D, Mashamba-Thompson TP. Toward Improving Accessibility of Point-of-Care Diagnostic Services for Maternal and Child Health in Low- and Middle-Income Countries. *Point of Care* 2019; **18**(1): 17-25.
11. Osorio L, Garcia JA, Parra LG, et al. A scoping review on the field validation and implementation of rapid diagnostic tests for vector-borne and other infectious diseases of poverty in urban areas. *Infectious Diseases of Poverty* 2018; **7**(1): 87.

### Supplemental file 3: Search terms and Boolean connectors

**Testing:-** (point-of-care-test[tiab] OR point-of-care-testing[mesh] OR point-of-care-testing[tiab] OR point-of-care-tests[tiab] OR self-test[tiab] OR self-testing[tiab] OR self-tests[tiab] OR self-tested[tiab] OR decentralized-testing[tiab] OR bedside-test[tiab] OR bedside-testing[tiab] OR bedside-tests[tiab] OR self-screening[tiab] OR self-collect[tiab] OR self-collected[tiab] OR self-collecting[tiab] OR self-sample[tiab] OR self-samples[tiab] OR self-sampling[tiab] OR self-sampled[tiab] OR direct-to-consumer-screening-and-testing[mesh] OR direct-to-consumer-screening-and-testing[tiab] OR direct-to-consumer-screening[tiab] OR direct-to-consumer-testing[tiab] OR diagnostic-tests,-routine[mesh] OR routine-diagnostic-test[tiab] OR routine-diagnostic-tests[tiab] OR routine-diagnostic-testing[tiab] OR screening-test[tiab] OR screening-tests[tiab] OR in-vitro-diagnostics[tiab] OR rapid-diagnostics[tiab] OR mass-screening[mesh] OR mass-screening[tiab] OR mass-screenings[tiab] OR workplace-testing[tiab] OR workplace-tests[tiab] OR pharmacy-based-testing[tiab] OR door-to-door-testing[tiab] OR home-based-testing[tiab] OR home-test[tiab] OR home-tests[tiab] OR home-testing[tiab] OR home-based-test[tiab] OR home-based-tests[tiab] OR self-implemented[tiab] OR community-based-testing[tiab] OR community-based-HIV-testing[tiab])

### AND

**Disease:-** (HIV[mesh] OR HIV[tiab] OR Human-immunodeficiency-virus[tiab] OR Acquired-Immunodeficiency-Syndrome[mesh] OR Acquired-Immunodeficiency-Syndrome[tiab] OR Acquired-Immune-Deficiency-Syndrome[tiab] OR Acquired-Immuno-Deficiency-Syndrome[tiab] OR Acquired-Immuno-Deficiency-Syndromes[tiab] OR Acquired-Immunodeficiency-Syndromes[tiab] OR chlamydia[mesh] OR chlamydia[tiab] OR trachoma[mesh] OR trachoma[tiab] OR trachomas[tiab] OR mycobacterium-tuberculosis[mesh] OR mycobacterium-tuberculosis[tiab] OR hepatitis-B[mesh] OR hepatitis-B[tiab] OR type-b-hepatitis[tiab] OR viral-hepatitis-type-B[tiab] OR leprosy[mesh] OR leprosy[tiab] OR leprosies[tiab] OR hansen-disease[tiab] OR hansen's-disease[tiab] OR hansen-disease[tiab] OR hepatitis-C[mesh] OR hepatitis-C[tiab] OR gonorrhoea[mesh] OR gonorrhoea[tiab] OR gonorrhoeae [tiab] OR gonorrhoea[tiab] OR gonococcal-infection[tiab] OR gonococcal-infections[tiab] OR gonococcus-infection[tiab] OR gonococcosis[tiab] OR filariasis[mesh] OR filariasis[tiab] OR dengue[mesh] OR dengue[tiab] OR syphilis[mesh] OR syphilis[tiab] OR mycobacterium-infections[mesh] OR mycobacterium-infections[tiab] OR paratuberculosis[mesh] OR paratuberculosis[tiab] OR communicable-diseases[mesh] OR communicable-diseases[tiab] OR communicable-disease[tiab] OR Infectious-Diseases[tiab] OR Infectious-Disease[tiab])

#### Supplemental File 4: Summary of studies included

| No | First Author       | Country      | Testing site                             | Study design    | Disease                             | Type of test (self-testing/self-sampling) | Sample size                  |
|----|--------------------|--------------|------------------------------------------|-----------------|-------------------------------------|-------------------------------------------|------------------------------|
| 1  | Novak, D. P.       | Sweden       | university                               | cross sectional | CT                                  | self-collection                           | 200 (100 males, 100 females) |
| 2  | Jones, H. E.       | South Africa | Wellness Center                          | RCT             | NG, CT and TV                       | self-collection and self-testing          | 626                          |
| 3  | Graseck, A. S<br>1 | USA          | Home, Clinic                             | RCT             | CT and NG                           | self-collection, clinical testing         | 558                          |
| 4  | Jenkins, W. D.     | USA          | University                               | RCT             | CT,                                 | self-collection                           | 175                          |
| 5  | Jurgensen, M.      | Zambia       | Home, Clinic                             | mixed methods   | HIV                                 | homebased testing                         | 1694                         |
| 6  | Mulogo, E. M.      | Uganda       | Home, Clinic                             | Mixed methods   | HIV                                 | Home testing/facility testing             | 994                          |
| 7  | Falk, L.           | Sweden       | Home, Clinic                             | RCT             | CT                                  | self-collection                           | 660 (Home) clinic (445).     |
| 8  | MacPherson, P.     | Malawi       | Home, Clinic                             | RCT             | HIV                                 | Self-testing                              | 16,660                       |
| 9  | Wood, M.           | UK           | Sauna, Home, clinic                      | RCT             | CT, NG, HIV, syphilis, hep. B and C | self-collection, self-testing             | 90                           |
| 10 | Bassett, I. V.     | South Africa | Mobile community based, clinic community | cross sectional | HIV                                 | Lay counsellor testing                    | 4,701                        |
| 11 | Haskew, J.         | Kenya        | community                                |                 | HIV                                 | community based testing                   | 1,752                        |
| 12 | Parker, L. A.      | Swaziland    | community                                | cross sectional | HIV                                 | community-based HIV testing               | 9 060                        |
| 13 | Crawford, N. D.    | USA          | Pharmacy                                 | cohort study    | HIV                                 | In-pharmacy HIV testing                   | 688                          |

|    |                    |                  |                              |                             |                          |                                             |                                                                                                   |
|----|--------------------|------------------|------------------------------|-----------------------------|--------------------------|---------------------------------------------|---------------------------------------------------------------------------------------------------|
| 14 | Kadede, K.         | Uganda and Kenya | Mobile community based, Home | Cross-sectional             | HIV                      | hybrid Mobile testing and homebased testing | Total: 116326 Kenya (41,633) Uganda (74,693)                                                      |
| 15 | Thirumurthy, H.    | Kenya            | Home                         | cohort study                | HIV                      | self-testing                                | 277 (60 ANC, 116 PPC, 101 FSW)                                                                    |
| 16 | Chanda, M. M.      | Zambia           | Home, Clinic                 | cluster RCT                 | HIV                      | self-testing                                | Total: 965 Standard testing (320) Direct delivery (316); HIV self-test (329)                      |
| 17 | Kersaudy-Rahib, D. | France           | Home, Clinic                 | RCT                         | Chlamydia trachomatis    | self- sampling                              | Total: 11 075 Intervention: 5531 control: 5544                                                    |
| 18 | Li, S.             | China            | Dental Hospital              | case-control study          | HIV                      | Point of care testing                       | Total: 1574 Routine PITC:758 Oral rapid HIV testing: 816                                          |
| 19 | Miller, R. L.      | USA              | community, clinic            | observational study         | HIV                      | Mobile and community Point of care testing  | Total: 3301                                                                                       |
| 20 | Ortblad, K.        | Uganda           | Home, Clinic                 | cluster-RCT                 | HIV                      | Self-testing                                | Total: 960 Standard testing: 34% (328); Direct delivery: 31% (296) Facility collection: 35% (336) |
| 21 | Gichangi, A.       | Kenya            | Home, Clinic                 | RCT                         | HIV                      | Self-testing                                | Total: 1410 (standard-of-care: 471, improved card: 467, HIVST:472)                                |
| 22 | Guy, R. J.         | Australia        | home, clinic                 | Cluster RCT crossover trial | chlamydia and gonorrhoea | self-collection                             | 860 (Intervention (n=455) Standard care (n=405))                                                  |
| 23 | Katz, D. 2018      | USA              | Home, Clinic                 | RCT                         | HIV                      | Self-testing                                | 230 (self-test arm: 116; control arm: 114)                                                        |
| 24 | Green, K. E.       | Vietnam          | Home, CBO                    | descriptive analysis        | HIV                      | self-testing, lay counsellor testing        | Total: 1351 (548 HIV lay provider testing and 803 HIVST)                                          |
| 25 | Kelvin, E. A.1     | Kenya            | Home, Clinic                 | RCT                         | HIV                      | self-testing                                | Total: 305 (SOC arm 155 (50.8%), Choice arm 150 (49.2%))                                          |

|    |                  |              |                         |                          |              |                                      |                                                                                                                         |
|----|------------------|--------------|-------------------------|--------------------------|--------------|--------------------------------------|-------------------------------------------------------------------------------------------------------------------------|
| 26 | Lightfoot, M. A. | USA          | Home, Clinic            | comparative study        | HIV          | self-testing                         | County Program (N = 1205), Self-Testers (N = 114)                                                                       |
| 27 | Merchant, R. C.  | USA          | Home, Clinic            | Randomized Trial         | HIV          | self-testing, clinic testing         | Total: 425                                                                                                              |
| 28 | Oldenburg, C. E. | Zambia       | Home, Clinic            | Randomized Trial         | HIV          | self-testing, clinic testing         | Total: 965 Standard testing (320); Direct delivery (316); HIV self-test coupon (329)                                    |
| 29 | Choko, A. T.     | Malawi       | Home, Clinic            | cluster randomised trial | HIV          | self-testing, clinic testing         | Total: 2,349 Standard testing, (408); Self-test only (442); Self-Test + \$3 (380); ST + \$10 (512); ST + reminder (452) |
| 30 | Harichund, C.    | South Africa | Home, Clinic            | cross-over study         | HIV          | self-testing, clinic testing         | 40                                                                                                                      |
| 31 | Lebina, L.       | South Africa | Home, community testing | prospective study        | HIV          | self-testing                         | 1618                                                                                                                    |
| 32 | Mulubwa, C.      | Zambia       | home                    | cluster-randomised trial | HIV          | self-testing, lay counsellor testing | Total: 26973 (HIV self-testing =13 267; Non-HIV self-testing =13 706)                                                   |
| 33 | Ortblad, K. F.   | Uganda       | Home, Clinic            | RCT                      | HIV          | self-testing, clinic testing         | Total: 960 Standard testing: 34% (328); Direct delivery: 31% (296); Facility collection: 35% (336)                      |
| 34 | Domeika, M.      | Sweden       | Home, Clinic            | cohort study             | CT           | Self-sampling                        | 94                                                                                                                      |
| 35 | Cook, R. L.      | USA          | Home, Clinic            | RCT                      | CT, NG, STIs | Self-sampling, clinician sampling    | 403 (intervention group 197, control group 191)                                                                         |
| 36 | Lippman, S. A.   | Brazil       | Home, Clinic            | RCT                      | CT and NG    | Self-sampling, self-testing          | 818 (home = 410; clinic = 408)                                                                                          |
| 37 | Graseck, A. S.   | USA          | Home, Clinic            | RCT                      | CT and NG    | self-collection, clinic testing      | 462                                                                                                                     |
| 38 | Tabana, H et al  | South Africa | Home, Clinic            | Cluster RCT              | HIV          | No                                   | Intervention=22,099; Control=23,864                                                                                     |

|    |                   |                           |                                                         |                              |                                    |                                                         |                                                                                               |
|----|-------------------|---------------------------|---------------------------------------------------------|------------------------------|------------------------------------|---------------------------------------------------------|-----------------------------------------------------------------------------------------------|
| 39 | Syred, J et al    | UK                        | Clinic                                                  | quasi-experimental           | HIV, Syphilis, CT, NG, Hep B and C | Self-sampling                                           | Before=7550 orders; After=9785 orders                                                         |
| 40 | Weidle, P J et al | US                        | Community pharmacies, clinic                            | Cohort                       | HIV                                | No                                                      | 1540                                                                                          |
| 41 | Reddy, E et al    | Tanzania                  | 3 community-based centres; health facility              | Cohort                       | HIV                                |                                                         | 1188                                                                                          |
| 42 | Huppert et al     | US                        | Home; clinic                                            | RCT                          | Trichomoniasis                     | Self-testing                                            | 247                                                                                           |
| 43 | Meehan et al      | South Africa              | Stand-alone community centre; mobile services           | RCT                          | HIV                                | No                                                      | 5031                                                                                          |
| 44 | Kelvin, E A et al | Kenya                     | Home, clinic                                            | RCT                          | HIV                                | Self-testing                                            | 2196                                                                                          |
| 45 | Morano et al      | US                        | POC and standard HCV testing                            | RCT                          | HCV                                | No                                                      | 1,345                                                                                         |
| 46 | Johnston et al    | Canada                    | POCT and standard screening                             | Cross sectional              | HIV                                | No                                                      | 3204. 2205(POCT) and 999(Standard screening)                                                  |
| 47 | Barnabas et al    | South - Africa and Uganda | Community based; clinic                                 | RCT                          | HIV                                | No                                                      | 1,325                                                                                         |
| 48 | Des Marais et al, | USA                       | Home, Clinic                                            | observational                | HPV and other STIs                 | Self-collected vs clinician-collected samples           | 284                                                                                           |
| 49 | Fylkesnes et al,  | Zambia                    | Home, Clinic/Community                                  | Cluster-randomized trial     | HIV                                | Home-based VCT plus standard care vs standard care only | Total: 1694 intervention arm: 836 (394 men, 442 women), control arm: 858 (386 men, 472 women) |
| 50 | Hook et al,       | USA                       | STI clinic                                              | Prospective cross-over trial | Chlamydia                          | Rapid diagnostic assay CT screening                     | 3788                                                                                          |
| 51 | Jamil et al,      | Australia                 | sexual health clinics and community-based organisations | RCT                          | HIV                                | HIV self-testing versus standard facility-based testing | Total: 362 (174in the standard care group (162 person-years).                                 |
| 52 | Jani et al        | Mozambique                | primary healthcare centres                              | Cluster-randomized trial     | HIV                                | POC device                                              | Total: 3910 (POC arm: 2034, SOC arm: 1876)                                                    |

|    |                    |                                               |                                                        |                           |                          |                                         |                                                                |
|----|--------------------|-----------------------------------------------|--------------------------------------------------------|---------------------------|--------------------------|-----------------------------------------|----------------------------------------------------------------|
| 53 | Mabey et al,       | Tanzania, Uganda, China, Peru, Zambia, Brazil | ANC clinics, health facilities and community-based     | (before-after design)     | Syphilis                 | POC test                                | Pre-POCT introduction: 46,760, Post-POCT introduction: 217,665 |
| 54 | Master et al,      | Kenya                                         | Self-test vs clinic                                    | Randomized clinical trial | HIV                      | HIV self-test vs HIV testing at clinic  | Total: 600 (HIVST group) 570 (control group)                   |
| 55 | Banerjee, P.       | UK                                            | Home, Clinic                                           | retrospective analysis    | CT and NG                | self-collection, clinician sampling     | 28,451 (Home test = 9258, clinic tested= 19,193)               |
| 56 | Bradshaw, C. S.    |                                               | street clinic                                          | cross sectional study     | STI                      | self-collection, clinician sampling     | 314                                                            |
| 57 | Chin-Hong, P. V.   | USA                                           | Home, Clinic                                           | Cross-sectional study.    | HPV                      | self-collection, clinician sampling     | 126                                                            |
| 58 | Fisher, M.         | UK                                            | Home, Clinic                                           | Observational Study       | STI                      | home self-testing, clinic-based testing | 433                                                            |
| 59 | Francis, S. C.     | Uganda                                        | school                                                 | Mixed method              | bacterial vaginosis, HIV | Self-sampling                           | 155                                                            |
| 60 | Guenter, D.        | Canada                                        | point of care                                          | prospective cohort study  |                          | Point of care                           | 1610                                                           |
| 61 | Gupte, S.          | India                                         | clinic                                                 | NA                        | Syphilis                 | Point of care                           | 31,395                                                         |
| 62 | Hanrahan, C. F.    | South Africa                                  | primary care clinic                                    | prospective cohort study  | TB                       | clinician sampling                      | 1861                                                           |
| 63 | Holland-Hall, C.M. | USA                                           | Detention center                                       | comparison study          | NG, CT                   | Self-collection                         | 133                                                            |
| 64 | Kersaudy-Rahib, D. | France                                        | Home, Clinic                                           | RCT                       | Chlamydia                | self-collection, clinician sampling     | 11 075                                                         |
| 65 | Lawton, B.A.       | New Zealand                                   | primary care practices                                 | RCT                       | Chlamydia, Trichomonas   | self-sampling                           | 2404                                                           |
| 66 | Lee E.             | Australia                                     | Community-based service & Traditional Clinical setting | Surveillance study        | HIV                      | NA                                      | 9944                                                           |
| 67 | Lessells R. J      | South Africa                                  | Health subdistrict                                     | Cluster-RCT               | TB                       | clinician sampling                      | 1297enrolled/1526 screened                                     |
| 68 | Shifu Li,          | China                                         | Dental Clinic                                          | Case-Control Study        | HIV                      | Clinician sampling                      | 1574; 758 for routine and 816 for oral rapid test              |



|    |                          |           |                                            |                     |           |                                   |                          |
|----|--------------------------|-----------|--------------------------------------------|---------------------|-----------|-----------------------------------|--------------------------|
| 69 | Lemoine M.,              | Gambia    | communities; central hospital (blood bank) | Observational study | HBV       | clinician sampling                | 8170                     |
| 70 | Xiaofang, Z              | China     | NA-Online Platform-M health                | RCT                 | HIV       | self-sampling                     | 100                      |
| 71 | Tyler B.W.               | U.S.      | NA                                         | RCT                 | HIV       | self-sampling; clinician sampling | 65                       |
| 72 | Smith K.S.,              | Australia | NA                                         | RCT                 | Chlamydia | Self-sampling; clinician sampling | 600 (200 women, 200 MSM) |
| 73 | Kenneth J. Smith,        | USA       | NA                                         | RCT                 | CT and NG | self-sampling; clinician sampling | 398                      |
| 74 | Samuel Muhula            | Kenya     | NA                                         | RCT                 | HIV       | NA                                | 18591                    |
| 75 | Hendramoorthy Maheswaran | Malawi    | primary health clinics                     | RCT                 | HIV       | Self-sampling; clinician sampling | 1, 241                   |
| 76 | Hendramoorthy Maheswaran | Malawi    | NA                                         | Cluster-RCT         | HIV       | NA                                | Not stated               |

## Supplemental File 5: GRADE Tables and quality of evidence

| Certainty assessment                   |              |               |              |             |                  |                               | Summary of findings   |              |                          |                                  |                                   |
|----------------------------------------|--------------|---------------|--------------|-------------|------------------|-------------------------------|-----------------------|--------------|--------------------------|----------------------------------|-----------------------------------|
| Nº of participants (studies) Follow-up | Risk of bias | Inconsistency | Indirectness | Imprecision | Publication bias | Overall certainty of evidence | Study event rates (%) |              | Relative effect (95% CI) | Anticipated absolute effects     |                                   |
|                                        |              |               |              |             |                  |                               | Control               | Intervention |                          | Risk with Facility-based testing | Risk difference with Self-testing |

### Self-testing VS facility-based testing for HIV

|                               |                      |                      |             |             |                                                                         |                  |                        |                        |                                  |               |                                                       |
|-------------------------------|----------------------|----------------------|-------------|-------------|-------------------------------------------------------------------------|------------------|------------------------|------------------------|----------------------------------|---------------|-------------------------------------------------------|
| 50979<br>(10 RCTs)<br>(1 NRS) | serious <sup>a</sup> | serious <sup>b</sup> | not serious | not serious | all plausible residual confounding would reduce the demonstrated effect | ⊕⊕⊕○<br>MODERATE | 15775/25930<br>(60.8%) | 16450/25049<br>(65.7%) | <b>OR 1.41</b><br>(1.36 to 1.46) | 608 per 1,000 | <b>78 more per 1,000</b><br>(from 70 more to 86 more) |
|-------------------------------|----------------------|----------------------|-------------|-------------|-------------------------------------------------------------------------|------------------|------------------------|------------------------|----------------------------------|---------------|-------------------------------------------------------|

### STI self-sampling VS Facility-based testing

|                              |             |                      |             |             |      |                  |                      |                      |                                  |               |                                                          |
|------------------------------|-------------|----------------------|-------------|-------------|------|------------------|----------------------|----------------------|----------------------------------|---------------|----------------------------------------------------------|
| 13525<br>(6 RCTs)<br>(0 NRS) | not serious | serious <sup>c</sup> | not serious | not serious | none | ⊕⊕⊕○<br>MODERATE | 1123/6668<br>(16.8%) | 2518/6857<br>(36.7%) | <b>OR 3.60</b><br>(3.28 to 3.96) | 168 per 1,000 | <b>253 more per 1,000</b><br>(from 231 more to 277 more) |
|------------------------------|-------------|----------------------|-------------|-------------|------|------------------|----------------------|----------------------|----------------------------------|---------------|----------------------------------------------------------|

### Digital VS Conventional approaches for infectious diseases testing (Non-HIV)

|                              |                      |             |             |                      |      |             |                       |                       |                                  |               |                                                          |
|------------------------------|----------------------|-------------|-------------|----------------------|------|-------------|-----------------------|-----------------------|----------------------------------|---------------|----------------------------------------------------------|
| 25934<br>(2 RCTs)<br>(1 NRS) | serious <sup>a</sup> | not serious | not serious | serious <sup>d</sup> | none | ⊕⊕○○<br>LOW | 2946/12973<br>(22.7%) | 4595/12961<br>(35.5%) | <b>OR 1.87</b><br>(1.77 to 1.98) | 227 per 1,000 | <b>128 more per 1,000</b><br>(from 115 more to 141 more) |
|------------------------------|----------------------|-------------|-------------|----------------------|------|-------------|-----------------------|-----------------------|----------------------------------|---------------|----------------------------------------------------------|

**CI:** Confidence interval; **OR:** Odds ratio; **RCT:** Randomized Controlled Trials; **NRS:** Non-Randomized Studies

#### Explanations

- One of the studies is an observational study
- Some of the study results are not consistent with each other
- One of the included studies has the same results for the same group and the result is not estimable.
- The sample size of one of the included studies is very small
